# Supplementary material
Source: MDPI journal article supplement (https://www.mdpi.com/2073-4344/12/10/1281)
Supplement: s1 [file s1]

## **Supporting information**

### **Self-doped Carbon Dots Decorated TiO<sub>2</sub> Nanorods: A Novel Synthesis Route for Enhanced Photoelectrochemical Water Splitting**

#### **1.1.Characterizations:**

The morphology and composition of TiO<sub>2</sub> and TiO<sub>2</sub>@NCD4h were studied by field-emission scanning electron microscope (FESEM, S4800 Hitachi, Japan) and field-emission transmission electron microscopy (FETEM, Tecnai G2 F20, USA) with energy dispersive spectrometer (EDS). Absorption spectra were recorded with Cary 5000 UV-Vis-NIR spectrophotometer (Agilent, USA). The crystalline structures were acquired by X-ray diffraction (XRD; X'pert PRO MPD diffractometer, Netherlands) with a PANalytical X'celerator detector, using Cu K $\alpha$  ( $\lambda = 0.15406$  nm) source. X-ray photoelectron Spectroscopy (XPS) was performed to investigate the surface elemental compositions and chemical states by a PHI 5600 spectrometer (USA) with a monochromatic Al K $\alpha$  X-ray source. Raman spectra were collected from XploRA PLUS Raman microscope (Horiba Jobin Yvon, UK.)

#### **PEC Experiment setup**

PEC tests were performed with an electrochemical workstation, Zive SP1 (WonATech Co., Ltd., Korea) using a three-electrode system with an as-prepared photoanode, a platinum mesh and a 3 M KCl Ag/AgCl electrode in a Luggin capillary as the working electrode, counter electrode and the reference electrode, respectively. The reactor used during the PEC test and other electrochemical measurements was a 50 mm x 50 mm x 20 mm quartz cell (Hellma, HE.700.000.OG20.) The electrolyte was 0.3 M Na<sub>2</sub>SO<sub>4</sub> (pH = 7). The linear sweep voltammetry (LSV) curves window from - 0.5 V to 1.3 V vs Ag/AgCl with scan rate of 20 mV s<sup>-1</sup>. I-t curves were obtained at a bias potential of 1.23 V vs Ag/AgCl for 1 h. Electrochemical impedance spectroscopy (EIS) was carried out under the frequency range of 10<sup>-2</sup> - 10<sup>5</sup> Hz with amplitude of 5 mV at bias potential of 0 V vs Ag/AgCl under a solar simulator (AM 1.5 G, 100 mW/cm<sup>2</sup>) irradiation. Mott-Schottky plots were measured with a frequency of 1 kHz under dark. The incident photon-to-current conversion efficiency (IPCE) was carried out at 1.23 V vs Ag/AgCl using a

xenon arc lamp (75 W, Ushio UXL-75XE) filtered by a dual-grating monochromator and individual filters onto the test devices.

## 2. Result and discussion

$$(Ah\nu)^2 = A (h\nu - E_g) \quad (S1)$$

Where  $a$ ,  $h$ ,  $\nu$ ,  $A$  and  $E_g$  means the absorbance index, Planck constant, frequency, constant and the band gap respectively.

where  $C$  represents space charge capacitance,  $e$  fundamental electron charge  $1.6 \times 10^{-19}\text{C}$ ;  $\epsilon$  semiconductor relative permittivity of the (35 for  $\text{TiO}_2$ );  $\epsilon_0$  permittivity of vacuum ( $8.86 \times 10^{-12}$  F/m);  $N_D$  carrier density;  $V$  applied potential,  $K_B$  Boltzmann constant and  $T$  is the absolute temperature.

$$\frac{1}{C^2} = \left( \frac{2}{e\epsilon\epsilon_0 N_D} \right) \left[ V - V_{FB} - \frac{K_B T}{e} \right] \quad (S2)$$

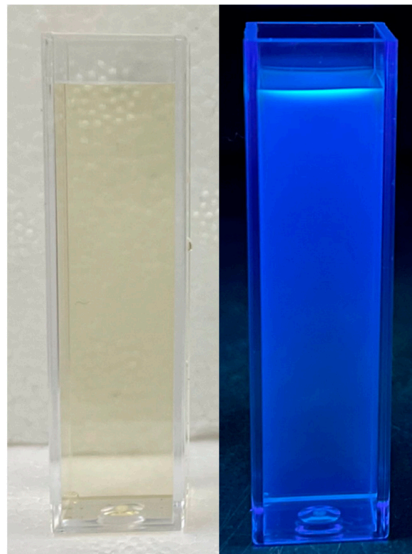

**Figure S1.** Images of NCDs' solution under natural and UV light

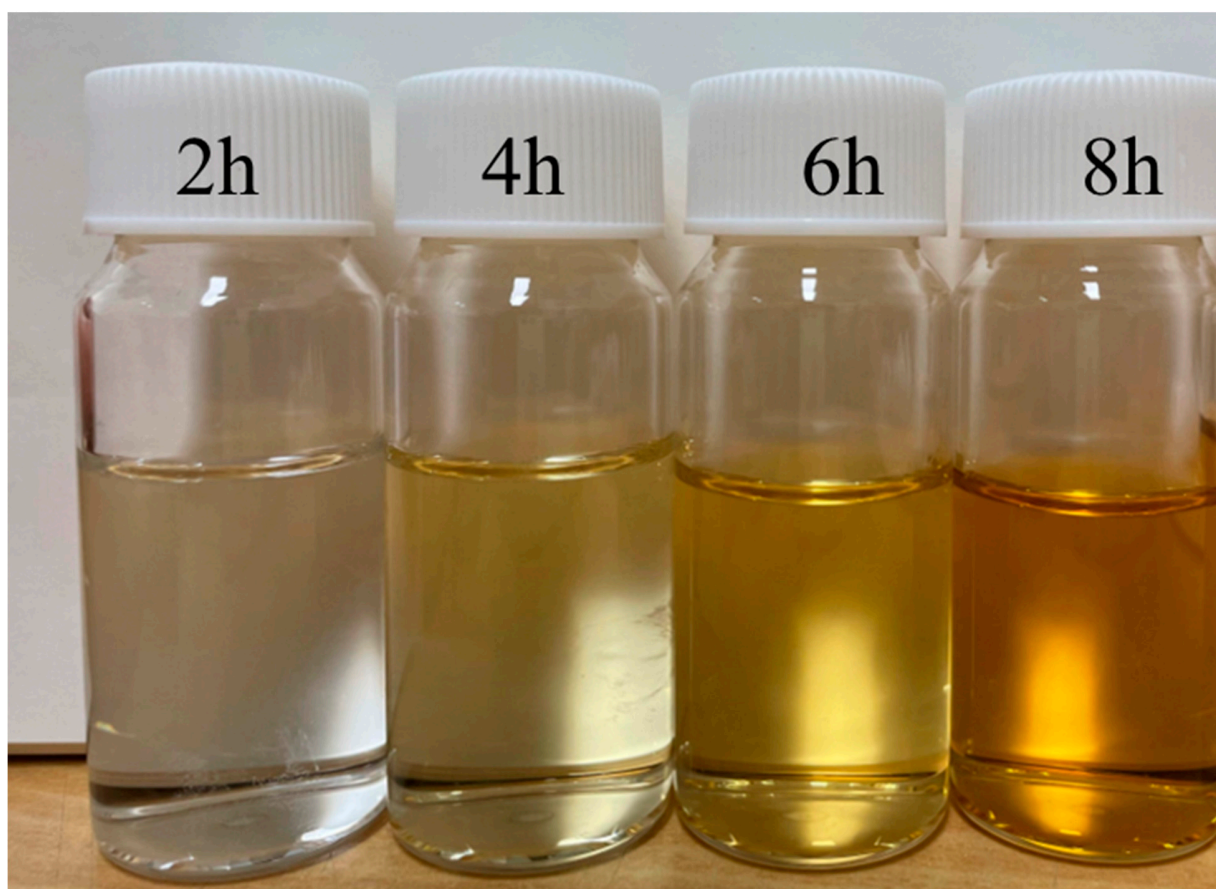

**Figure S2.** NCDs solution based on the reaction time

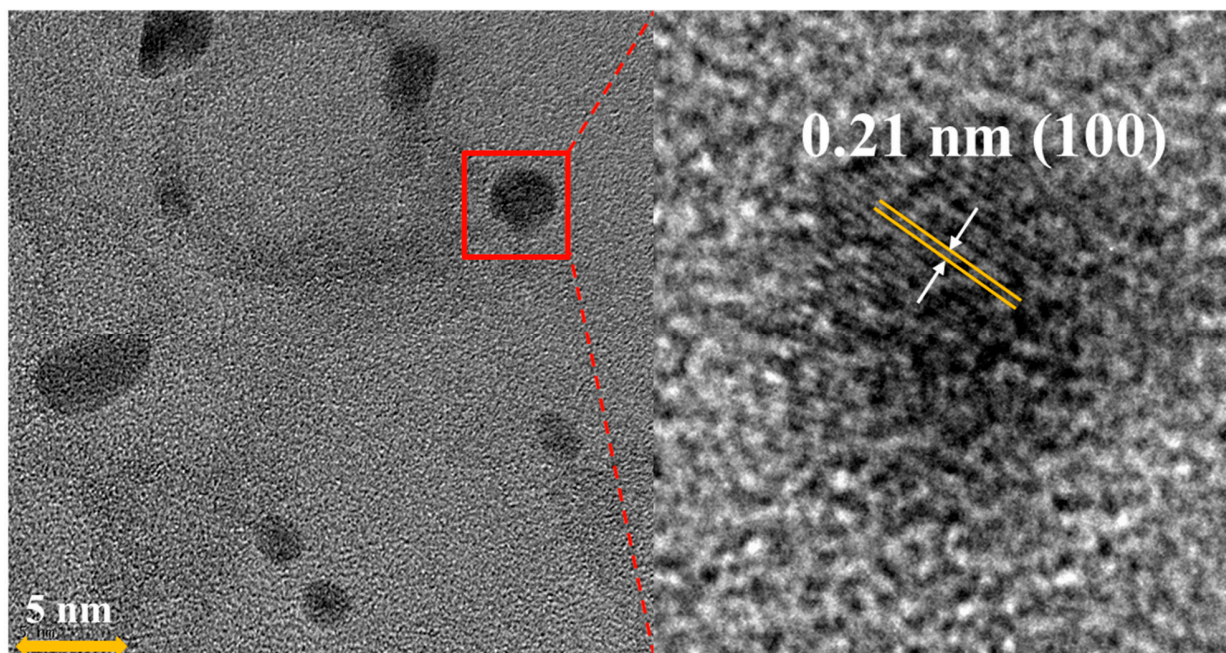

**Figure S3.** TEM of NCD

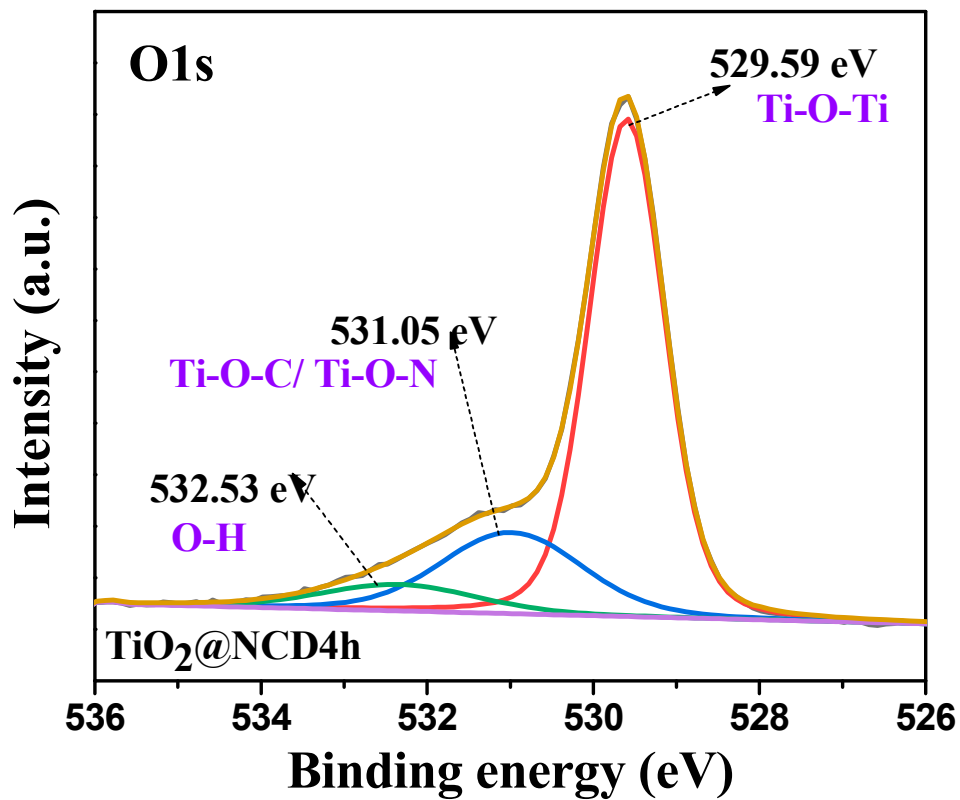

**Figure S4.** XPS O 1s spectra of TiO<sub>2</sub>@NCDs4h

**Table. S1.** EIS Data of TiO<sub>2</sub> and NCD decorated TiO<sub>2</sub> photoanodes \

| Photoanode               | R <sub>s</sub> (Ohm) | R <sub>ct</sub> (Ohm) |
|--------------------------|----------------------|-----------------------|
| TiO <sub>2</sub>         | 75                   | 376                   |
| TiO <sub>2</sub> @NCDs2h | 50.4                 | 273.6                 |
| TiO <sub>2</sub> @NCDs4h | 50.8                 | 248.3                 |
| TiO <sub>2</sub> @NCDs6h | 60                   | 277.2                 |
| TiO <sub>2</sub> @NCDs8h | 76.6                 | 297.4                 |

**Table S2.** The photocurrent densities of the TiO<sub>2</sub> and TiO<sub>2</sub>@NCDs photoanodes

| Photoanode              | Photocurrent Density (mA.cm <sup>-2</sup> ) |
|-------------------------|---------------------------------------------|
|                         | at 1.23 V vs Ag/AgCl                        |
| TiO <sub>2</sub>        | 0.73                                        |
| TiO <sub>2</sub> @NCD2h | 2.33                                        |
| TiO <sub>2</sub> @NCD4h | 2.51                                        |
| TiO <sub>2</sub> @NCD6h | 1.99                                        |
| TiO <sub>2</sub> @NCD8h | 1.85                                        |
